# Supplementary material
Source: Springer Nature journal article supplement (https://www.springermedizin.de/resource/supplementary/12872_2013_683_MOESM2_ESM.pdf/9430648)

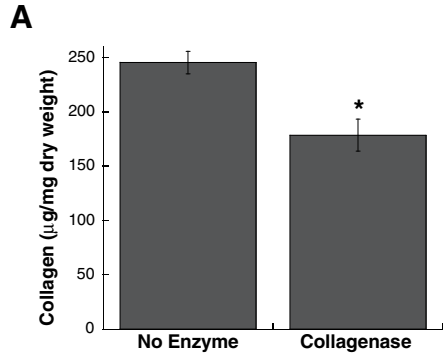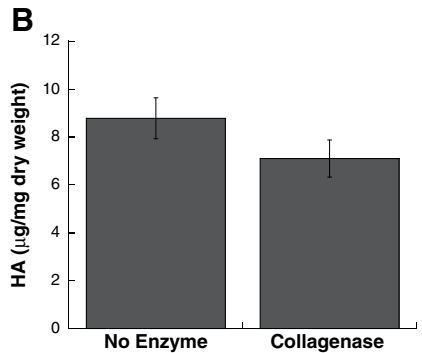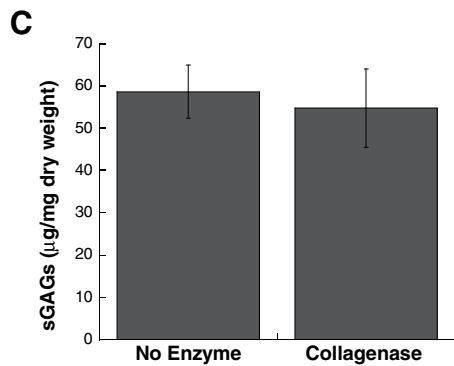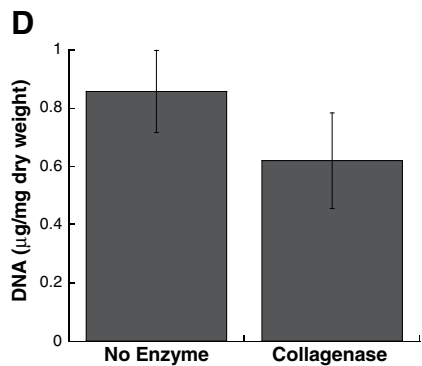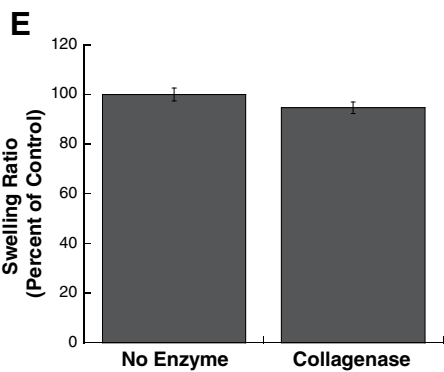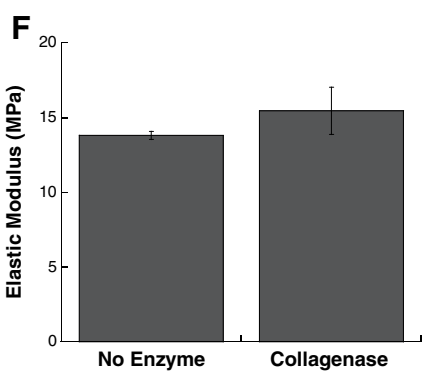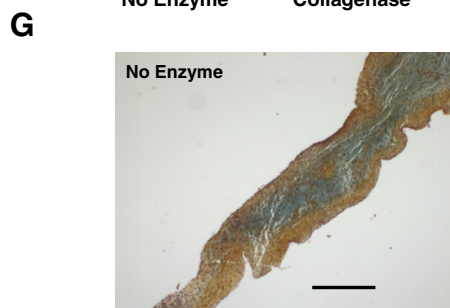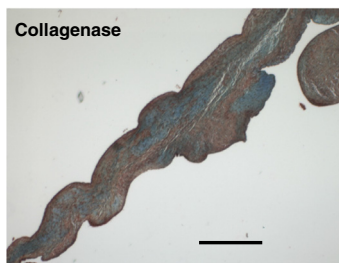

Supplement: MOESM2 [file 9430648]
